# Supplementary material for: Tool Use in Horses
Source: MDPI journal article supplement (doi:10.3390/ani12151876), 2022-07-22
Supplement: s1 [file s1]

## File S1: statistical data

Chi-squared test for given probabilities

```
data: c(9, 1, 1)
X-squared = 11.636, df = 2, p-value = 0.002973
```

warnmeldung:

```
In chisq.test(c(9, 1, 1)) : Chi-Quadrat-Approximation kann inkorrekt sein
> binom.test(c(9,1))
```

Exact binomial test

```
data: c(9, 1)
number of successes = 9, number of trials = 10, p-value = 0.02148
alternative hypothesis: true probability of success is not equal to 0.5
95 percent confidence interval:
 0.5549839 0.9974714
sample estimates:
probability of success
                0.9
```

Spearman's rank correlation rho

```
data: category.behaviour.response.to.restriction and category.restriction.
management
S = 83.313, p-value = 0.009877
alternative hypothesis: true rho is not equal to 0
sample estimates:
      rho
0.7086972
```
